# Supplementary material for: Water Stress Strengthens Mutualism Among Ants, Trees, and Scale Insects
Source: PLoS Biol. 2013 Nov 5;11(11):e1001705. doi: 10.1371/journal.pbio.1001705 (PMC3818173; doi:10.1371/journal.pbio.1001705)
Supplement: Table S2 — Maximum and minimum temperatures at three representative sites ± SD. (XLS) [file pbio.1001705.s013.xls]

## Sheet: Sheet1
Table S2. Maximum and minimum temperatures at three representative sites ± SD.
		Site
Months		Chamela	Huatulco	Santa Rosa
Jan-Dec (12 mo)	Maximum	31.4 ± 1.0˚C	33.2 ± 0.6˚C	30.9 ± 1.9˚C
	Minimum	19.9 ± 2.8˚C	21.0 ± 1.5˚C	21.9 ± 0.5˚C
Jan-Apr (dry season)	Maximum	30.2 ± 0.2˚C	33.6 ± 0.5˚C	32.7 ± 1.8˚C
	Minimum	16.7 ± 0.7˚C	19.8 ± 1.4˚C	22.0 ± 0.6˚C
May-Dec (rainy season)	Maximum	31.9 ± 0.6˚C	33.0 ± 0.6˚C	30.0 ± 1.3˚C
	Minimum	21.5 ± 1.9˚C	21.6 ± 1.2˚C	21.9 ± 0.5˚C
Weather-station data were averaged over the following years: Chamela 1982-2009; Huatulco 1980-2010; and Santa Rosa 1979-1997.
